# Supplementary material for: SNP located in an AluJb repeat downstream of TMCO1, rs4657473, is protective for POAG in African Americans
Source: PubMed Central journal article supplement — Br J Ophthalmol. 2019 Mar 12;103(10):1530–6. doi: 10.1136/bjophthalmol-2018-313086 (PMC6817700; doi:10.1136/bjophthalmol-2018-313086), 2019-03-12
Supplement: bjophthalmol-2018-313086supp001.pdf [file bjophthalmol-2018-313086supp001.pdf]

**SUPPLEMENTARY INFORMATION****SUPPLEMENTARY TABLES****Supp. Table 1. Oligonucleotides for EMSA probe and competition experiments. Probes represented haplotypes containing *TMC01* SNP variants at either rs4657473, rs116461237 or rs61058666.**

| EMSA Probes | Sequence                                                       | Description                             |
|-------------|----------------------------------------------------------------|-----------------------------------------|
| Nppa        | Forward 5'-TCTGCTCTTCTCACACCTTTGAAGTGGGGGCTCTTG-3'             | positive control<br>(Postma et al 2008) |
|             | Reverse 5'-CAAGAGGCCCCCACTTCAAAGGTGTGAGAAGAGCAGA-3'            |                                         |
| CGGA        | Forward 5'-GCCCACCTCGGCCTCCCAAAGTTCTAGGATTACAGGTGTGAGCTACC-3'  | Wildtype Alleles<br>C,G,G               |
|             | Reverse 5'-GGTAGCTCACACCTGTAATCCTAGAACTTTGGGAGGCCGAGGTGGGC-3'  |                                         |
| TGGA        | Forward 5'-GCCCACCTCAGCCTCCCAAAGTTCTAGGATTATAGGTGTGAGCTACC-3'  | rs4657475<br>C>T                        |
|             | Reverse 5'-GGTAGCTCACACCTATAATCCTAGAACTTTGGGAGGCTGAGGTGGGC -3' |                                         |
| CAGA        | Forward 5'-GCCCACCTCGGCCTCCCAAAGTTCTAGGATTACAGATGTGAGCTACC -3' | rs116461237<br>G>A                      |
|             | Reverse 5'-GGTAGCTCACATCTGTAATCCTAGAACTTTGGGAGGCCGAGGTGGGC -3' |                                         |
| CGCA        | Forward 5'-GCCCACCTCGGCCTCCCAAAGTTCTAGGATTACAGGTGTCAGCTACC -3' | rs61058666<br>G>C                       |
|             | Reverse 5'-GGTAGCTGACACCTGTAATCCTAGAACTTTGGGAGGCCGAGGTGGGC -3' |                                         |
| Alu         | Forward 5'-GCCCCGCTCGGCCTCCCAAAGTGCTGGGATTACAGGCGTGAGCCACC-3'  | Alu consensus                           |
|             | Reverse 5'-GGTGGCTCAGCCTGTAATCCCAGCACTTTGGGAGGCCGAGGCGGGC-3'   |                                         |
| ATTX        | Forward 5'-GCCCACCTCGGCCTCCCAAAGTTCTAGGATTAAAGTTGTTAGCTACC -3' | 3 SNP Mutations<br>(A,T,T)              |
|             | Reverse 5'-GGTAGCTAACAACTTTAATCCTAGAACTTTGGGAGGCCGAGGTGGGC -3' |                                         |
| CGTA        | Forward 5'-GCCCACCTCGGCCTCCCAAAGTTCTAGGATTACAGGTGTTAGCTACC -3' | rs61058666<br>mutation<br>G>T           |
|             | Reverse 5'-GGTAGCTAACACCTGTAATCCTAGAACTTTGGGAGGCCGAGGTGGGC-3'  |                                         |
| AGGA        | Forward 5'-GCCCACCTCGGCCTCCCAAAGTTCTAGGATTAAAGGTGTGAGCTACC-3'  | rs4657475<br>mutation<br>C>A            |
|             | Reverse 5'-GGTAGCTCACACCTTTAATCCTAGAACTTTGGGAGGCCGAGGTGGGC-3'  |                                         |

**Supp. Table 2. Primers for Luciferase Assay PCR Constructs**

| <b>PCR Construct (bp)</b> | <b>Primer Sequence</b>                      | <b>Chromosomal Position (GRCh38 assembly)</b> |
|---------------------------|---------------------------------------------|-----------------------------------------------|
| 3337                      | 5' - AGTTTGGAACACTAAAGACCACTT - 3' (Acc65I) | 1:165,719,327 - 165,715,991                   |
|                           | 5' - CGAGACAGAGGTCCATCTCCA - 3' (EcoRV)     |                                               |
| 1274                      | 5' - CCTTAGTTCCTTTGGCTTGTTGG - 3' (Acc65I)  | 1:165,718,361 - 165,717,088                   |
|                           | 5' - GACAAGAGAAGAGAAACAGCAGC - 3' (EcoRV)   |                                               |
| 703                       | 5' - TTTTCTGCAACTCAACTCACTGC - 3' (Acc65I)  | 1:165,718,126 - 165,717,424                   |
|                           | 5' - TCTACCTGCTCTCTTTCTCTCCT - 3' (EcoRV)   |                                               |
| 703_Rev                   | 5' - TTTTCTGCAACTCAACTCACTGC - 3' (EcoRV)   | 1:165,718,126 - 165,717,424                   |
|                           | 5' - TCTACCTGCTCTCTTTCTCTCCT - 3' (Acc65I)  |                                               |

Supplementary Table 3.

|                |               | TMCO1 rs11430311 |              |              |       | Age and Sex Adjusted Differences vs insT/insT |                    |       |
|----------------|---------------|------------------|--------------|--------------|-------|-----------------------------------------------|--------------------|-------|
|                |               | insT/insT        | insT/WT      | WT/WT        | p-val | insT/WT                                       | WT/WT              | p-val |
| CCT (mean)     | mean (stddev) | 531.5 (37.9)     | 529.3 (40.2) | 535.7 (41.4) | 0.33  | -2.2 (-6.4, 2.0)                              | 4.3 (-5.0, 13.6)   | 0.32  |
|                | n             | 887              | 508          | 71           |       |                                               |                    |       |
| CDR (mean)     | mean (stddev) | 0.71 (0.16)      | 0.72 (0.16)  | 0.72 (0.16)  | 0.92  | 0.00 (-0.02, 0.02)                            | 0.01 (-0.03, 0.04) | 0.95  |
|                | n             | 901              | 517          | 72           |       |                                               |                    |       |
| Max IOP (mean) | mean (stddev) | 25.7 (7.9)       | 26.1 (8.1)   | 25.9 (8.4)   | 0.63  | 0.4 (-0.5, 1.2)                               | 0.2 (-1.7, 2.1)    | 0.68  |
|                | n             | 925              | 531          | 75           |       |                                               |                    |       |
| RNFL (mean)    | mean (stddev) | 73.1 (13.5)      | 72.5 (12.9)  | 73.7 (14.1)  | 0.67  | -0.4 (-2.1, 1.2)                              | 0.6 (-2.9, 4.2)    | 0.80  |
|                | n             | 668              | 369          | 56           |       |                                               |                    |       |

|                |               | TMCO1 rs4657473 |              |              |       | Age and Sex Adjusted Differences vs C |                    |       |
|----------------|---------------|-----------------|--------------|--------------|-------|---------------------------------------|--------------------|-------|
|                |               | C               | Y            | T            | p-val | Y                                     | T                  | p-val |
| CCT (mean)     | mean (stddev) | 530.9 (39.2)    | 532.2 (37.8) | 506.7 (19.5) | 0.12  | 1.3 (-3.9, 6.4)                       | -21.2 (-45.3, 2.9) | 0.19  |
|                | n             | 1196            | 263          | 10           |       |                                       |                    |       |
| CDR (mean)     | mean (stddev) | 0.72 (0.15)     | 0.71 (0.18)  | 0.75 (0.15)  | 0.66  | -0.01 (-0.03, 0.01)                   | 0.02 (-0.08, 0.12) | 0.70  |
|                | n             | 1217            | 266          | 10           |       |                                       |                    |       |
| Max IOP (mean) | mean (stddev) | 25.8 (7.9)      | 26.2 (8.0)   | 29.6 (11.0)  | 0.24  | 0.4 (-0.6, 1.5)                       | 3.8 (-1.2, 8.7)    | 0.24  |
|                | n             | 1250            | 274          | 10           |       |                                       |                    |       |
| RNFL (mean)    | mean (stddev) | 72.8 (13.4)     | 73.4 (12.9)  | 82.8 (11.8)  | 0.21  | 0.7 (-1.3, 2.7)                       | 11.4 (0.0, 22.8)   | 0.12  |
|                | n             | 889             | 201          | 5            |       |                                       |                    |       |

|                |               | TMCO1 rs4657474 |              |              |       | Age and Sex Adjusted Differences vs G |                    |       |
|----------------|---------------|-----------------|--------------|--------------|-------|---------------------------------------|--------------------|-------|
|                |               | G               | R            | A            | p-val | R                                     | A                  | p-val |
| CCT (mean)     | mean (stddev) | 531.5 (37.9)    | 529.4 (40.1) | 535.6 (41.7) | 0.38  | -2.0 (-6.2, 2.2)                      | 4.1 (-5.3, 13.5)   | 0.38  |
|                | n             | 888             | 511          | 70           |       |                                       |                    |       |
| CDR (mean)     | mean (stddev) | 0.71 (0.16)     | 0.72 (0.16)  | 0.72 (0.16)  | 0.92  | 0.00 (-0.02, 0.02)                    | 0.01 (-0.03, 0.04) | 0.95  |
|                | n             | 902             | 520          | 71           |       |                                       |                    |       |
| Max IOP (mean) | mean (stddev) | 25.7 (7.9)      | 26.1 (8.1)   | 25.9 (8.5)   | 0.65  | 0.4 (-0.5, 1.2)                       | 0.1 (-1.8, 2.0)    | 0.70  |
|                | n             | 926             | 535          | 73           |       |                                       |                    |       |
| RNFL (mean)    | mean (stddev) | 73.1 (13.5)     | 72.4 (12.9)  | 73.9 (14.2)  | 0.62  | -0.4 (-2.1, 1.2)                      | 0.8 (-2.8, 4.4)    | 0.76  |
|                | n             | 668             | 372          | 55           |       |                                       |                    |       |

|                |               | TMCO1 rs4657475 |              |              |       | Age and Sex Adjusted Differences vs C |                    |       |
|----------------|---------------|-----------------|--------------|--------------|-------|---------------------------------------|--------------------|-------|
|                |               | C               | Y            | T            | p-val | Y                                     | T                  | p-val |
| CCT (mean)     | mean (stddev) | 531.5 (37.9)    | 529.4 (40.1) | 536.0 (41.9) | 0.34  | -2.1 (-6.3, 2.1)                      | 4.3 (-5.1, 13.8)   | 0.35  |
|                | n             | 888             | 512          | 69           |       |                                       |                    |       |
| CDR (mean)     | mean (stddev) | 0.71 (0.16)     | 0.72 (0.16)  | 0.72 (0.16)  | 0.91  | 0.00 (-0.02, 0.02)                    | 0.01 (-0.03, 0.04) | 0.94  |
|                | n             | 902             | 521          | 70           |       |                                       |                    |       |
| Max IOP (mean) | mean (stddev) | 25.7 (7.9)      | 26.1 (8.1)   | 25.8 (8.5)   | 0.67  | 0.3 (-0.5, 1.2)                       | 0.1 (-1.8, 2.0)    | 0.72  |
|                | n             | 926             | 536          | 72           |       |                                       |                    |       |
| RNFL (mean)    | mean (stddev) | 73.1 (13.5)     | 72.5 (12.9)  | 73.8 (14.3)  | 0.67  | -0.4 (-2.0, 1.2)                      | 0.7 (-2.9, 4.3)    | 0.80  |
|                | n             | 668             | 373          | 54           |       |                                       |                    |       |

|                |               | TMCO1 rs116461237 |              |       | Age and Sex Adjusted Differences vs G |       |
|----------------|---------------|-------------------|--------------|-------|---------------------------------------|-------|
|                |               | G                 | R            | p-val | R                                     | p-val |
| CCT (mean)     | mean (stddev) | 530.8 (38.9)      | 538.9 (37.4) | 0.20  | 7.6 (-4.7, 19.8)                      | 0.23  |
|                | n             | 1429              | 39           |       |                                       |       |
| CDR (mean)     | mean (stddev) | 0.71 (0.16)       | 0.72 (0.15)  | 0.67  | 0.01 (-0.04, 0.06)                    | 0.75  |
|                | n             | 1449              | 43           |       |                                       |       |
| Max IOP (mean) | mean (stddev) | 25.9 (8.0)        | 23.9 (7.5)   | 0.11  | -2.1 (-4.5, 0.3)                      | 0.09  |
|                | n             | 1490              | 43           |       |                                       |       |
| RNFL (mean)    | mean (stddev) | 72.9 (13.3)       | 72.3 (13.5)  | 0.80  | -0.6 (-5.2, 4.1)                      | 0.81  |
|                | n             | 1063              | 31           |       |                                       |       |

|                |               | TMCO1 rs61058666 |              |              |       | Age and Sex Adjusted Differences vs G |                     |       |
|----------------|---------------|------------------|--------------|--------------|-------|---------------------------------------|---------------------|-------|
|                |               | G                | S            | C            | p-val | S                                     | C                   | p-val |
| CCT (mean)     | mean (stddev) | 530.8 (38.8)     | 531.6 (38.1) | 543.7 (69.4) | 0.66  | 0.8 (-5.2, 6.7)                       | 11.9 (-16.8, 40.6)  | 0.70  |
|                | n             | 1276             | 185          | 7            |       |                                       |                     |       |
| CDR (mean)     | mean (stddev) | 0.71 (0.16)      | 0.72 (0.16)  | 0.71 (0.10)  | 0.71  | 0.01 (-0.01, 0.04)                    | -0.01 (-0.13, 0.10) | 0.64  |
|                | n             | 1298             | 187          | 7            |       |                                       |                     |       |
| Max IOP (mean) | mean (stddev) | 25.8 (8.0)       | 26.7 (8.0)   | 23.2 (4.1)   | 0.20  | 1.0 (-0.2, 2.2)                       | -3.0 (-8.9, 2.9)    | 0.17  |
|                | n             | 1334             | 192          | 7            |       |                                       |                     |       |
| RNFL (mean)    | mean (stddev) | 73.1 (13.4)      | 71.9 (13.1)  | 66.3 (7.7)   | 0.28  | -1.2 (-3.6, 1.1)                      | -5.7 (-16.1, 4.7)   | 0.34  |
|                | n             | 951              | 137          | 6            |       |                                       |                     |       |

|                |               | TMCO1 rs4656461 |              |              |       | Age and Sex Adjusted* Differences vs A |                    |       |
|----------------|---------------|-----------------|--------------|--------------|-------|----------------------------------------|--------------------|-------|
|                |               | A               | R            | G            | p-val | R                                      | G                  | p-val |
| CCT (mean)     | mean (stddev) | 531.5 (37.9)    | 529.5 (40.1) | 536.0 (41.9) | 0.36  | -2.0 (-6.2, 2.2)                       | 4.4 (-5.1, 13.8)   | 0.36  |
|                | n             | 887             | 512          | 69           |       |                                        |                    |       |
| CDR (mean)     | mean (stddev) | 0.71 (0.16)     | 0.72 (0.16)  | 0.72 (0.16)  | 0.92  | 0.00 (-0.02, 0.02)                     | 0.01 (-0.03, 0.04) | 0.94  |
|                | n             | 901             | 521          | 70           |       |                                        |                    |       |
| Max IOP (mean) | mean (stddev) | 25.7 (7.9)      | 26.2 (8.2)   | 25.8 (8.5)   | 0.59  | 0.4 (-0.4, 1.3)                        | 0.1 (-1.8, 2.0)    | 0.64  |
|                | n             | 925             | 536          | 72           |       |                                        |                    |       |
| RNFL (mean)    | mean (stddev) | 73.1 (13.5)     | 72.5 (12.9)  | 73.8 (14.3)  | 0.71  | -0.4 (-2.0, 1.3)                       | 0.7 (-2.9, 4.3)    | 0.82  |
|                | n             | 667             | 373          | 54           |       |                                        |                    |       |

**SUPPLEMENTARY FIGURES:**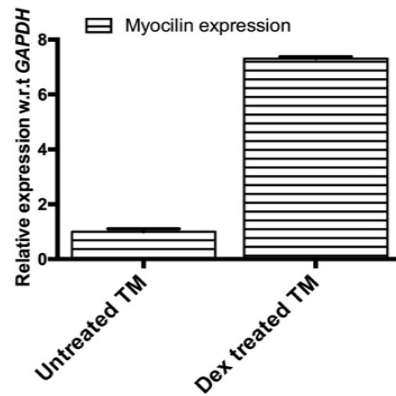

**Supp. Fig. S1.** Realtime PCR profiles showing the induction of Myocilin in TM cultures (P2 to P4 cultures) with 100mM Dexamethasone treatment for 3 days. The relative expression profiles of *Myocilin* transcript are presented with respect to GAPDH transcript.

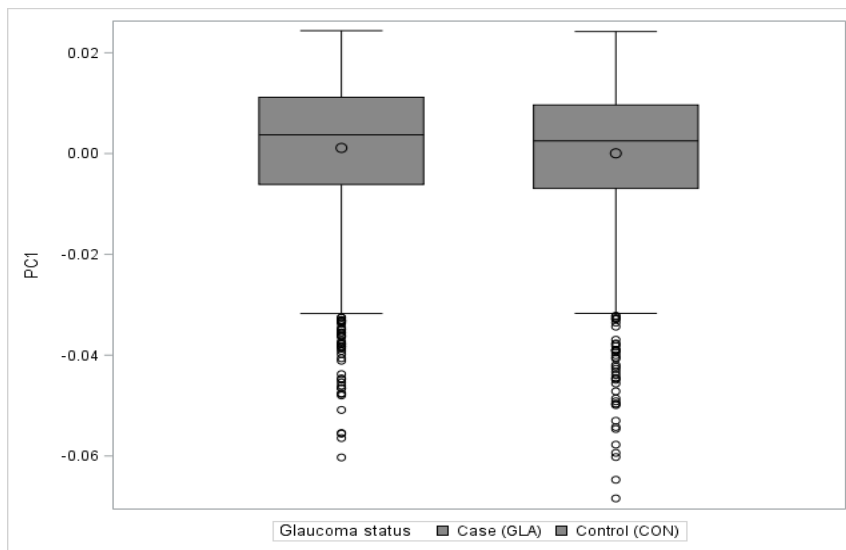

**Supp. Fig. S2.** Boxplots showing the comparison of the PC1 score between the cases and controls. No statistically significant difference was found between cases and controls ( $p=0.06$ ).

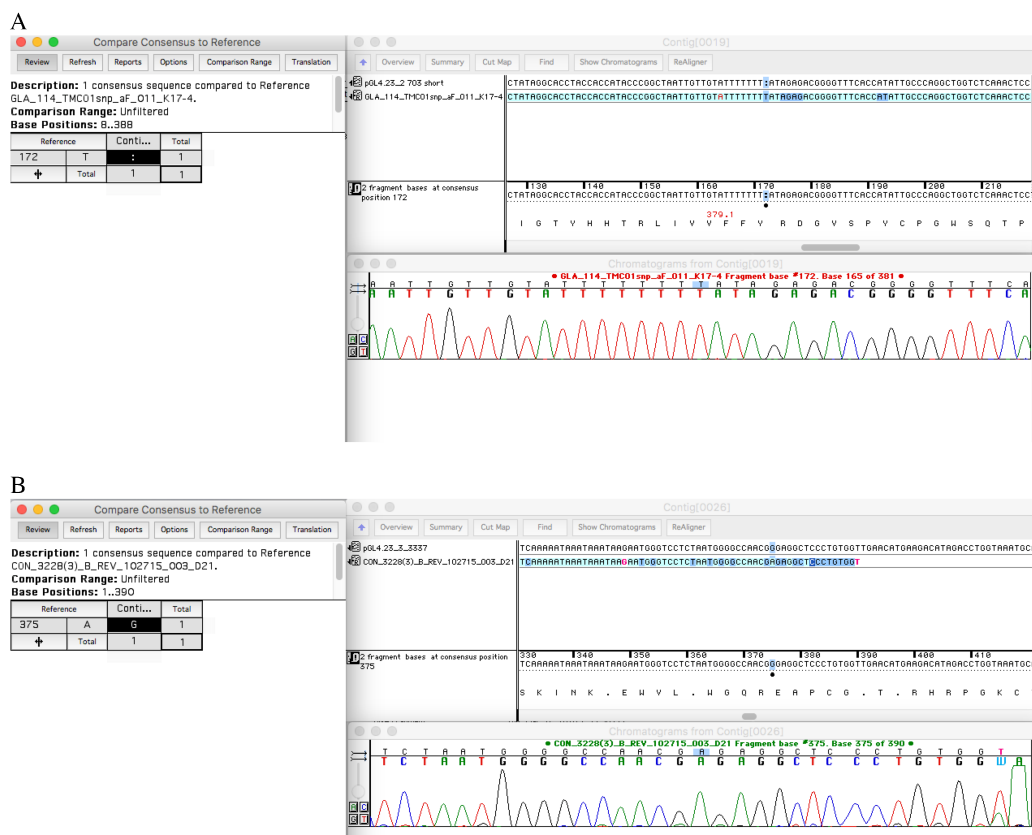

**Supp. Fig. 3.** Sequencing traces showing (a) Insert 2\_703 has variant rs11430311 (WT/WT) which is not expected from the haplotype associated with SNP rs 4657473. This variant is not seen in the other Insert 2 sequences as expected. (b) All Insert 3 sequences have a discrepancy in sequencing between previous genotyping and sequenced insert 201bp upstream of SNP rs11430311 (A>G). This may represent an introduced mutation at this location.

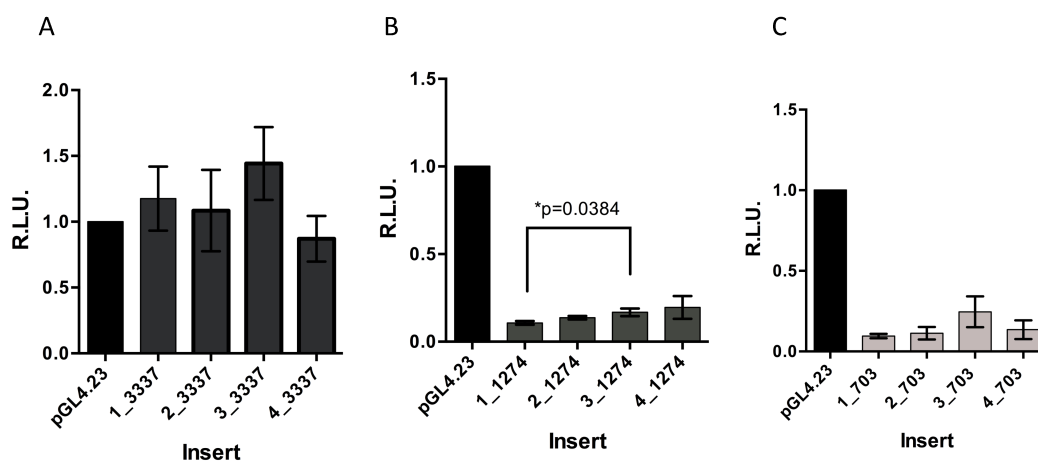

**Supp. Fig. 4.** Luciferase assays on TM cells showing, (A) 3337bp inserts does not have an effect on luciferase expression and (B) 1274bp and (C) 703bp inserts show repression of luciferase expression.

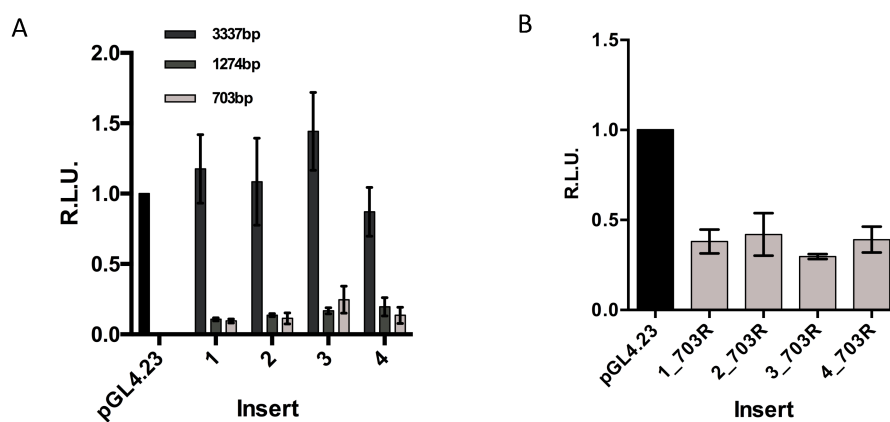

**Supp. Fig. 5.** Luciferase assays on TM cells showing, (A) a pattern of core repression with serial deletion of 3337bp insert is not evident and (B) 703bp insert does not demonstrate enhancer activity in the reverse orientation.
